# Supplementary material for: Quality of Life Scores Remained Different among the Genotypic Groups of Patients with Suspected Hemochromatosis, Even after Treatment Period
Source: MDPI journal article supplement (doi:10.3390/genes13010118), 2022-01-10
Supplement: s1 [file s1]

**Additional File 1: Table S1**

**Supplementary Table S1.** Comparison of mean ( $\pm$ standard deviation) values of the SF-36 domains according with initial and final phases among patient groups

| Variables                 |                  | Group 1 <sup>a</sup><br>n = 23 |         | Group 2 <sup>b</sup><br>n = 42 |         |
|---------------------------|------------------|--------------------------------|---------|--------------------------------|---------|
| SF-36 domains             | Follow-up phases | Mean $\pm$ SD                  | p value | Mean $\pm$ SD                  | p value |
| Physical functions        | Initial          | 81 $\pm$ 23                    | 0.74    | 89 $\pm$ 15                    | 0.20    |
|                           | Final            | 84 $\pm$ 24                    |         | 82 $\pm$ 22                    |         |
| Role-physical             | Initial          | 74 $\pm$ 42                    | 0.34    | 86 $\pm$ 30                    | 0.31    |
|                           | Final            | 74 $\pm$ 43                    |         | 73 $\pm$ 36                    |         |
| Bodily pain               | Initial          | 70 $\pm$ 21                    | 0.19    | 78 $\pm$ 22                    | 0.60    |
|                           | Final            | 64 $\pm$ 30                    |         | 74 $\pm$ 24                    |         |
| General health perception | Initial          | 66 $\pm$ 21                    | 0.34    | 66 $\pm$ 15                    | 0.30    |
|                           | Final            | 58 $\pm$ 21                    |         | 69 $\pm$ 21                    |         |
| Vitality                  | Initial          | 54 $\pm$ 26                    | 0.92    | 67 $\pm$ 19                    | 0.60    |
|                           | Final            | 56 $\pm$ 24                    |         | 67 $\pm$ 21                    |         |
| Social functioning        | Initial          | 70 $\pm$ 32                    | 0.64    | 87 $\pm$ 16                    | 0.65    |
|                           | Final            | 68 $\pm$ 31                    |         | 87 $\pm$ 22                    |         |
| Role-emotional            | Initial          | 75 $\pm$ 37                    | 0.02    | 82 $\pm$ 31                    | 0.31    |
|                           | Final            | 57 $\pm$ 45                    |         | 83 $\pm$ 30                    |         |
| Mental health             | Initial          | 66 $\pm$ 23                    | 0.94    | 74 $\pm$ 18                    | 0.30    |
|                           | Final            | 69 $\pm$ 22                    |         | 77 $\pm$ 21                    |         |

<sup>a</sup>Group 1: 23 patients with primary iron overload and homozygosity for the p.Cys282Tyr mutation. <sup>b</sup>Group 2:

42 patients with primary iron overload and other genotypes: compound heterozygosity for the p.Cys282Tyr/p.His63Asp (n = 10), heterozygosity for the p.Cys282Tyr (n = 4), homozygosity (n = 10) or heterozygosity (n = 8) for the p.His63Asp, or absence of p.Cys282Tyr and p.His63Asp (n = 10).

**Additional File 2: Table S2**

**Supplementary Table S2.** Comparison of serum ferritin (ng/mL) values and the SF-36 domains according with initial and final phases in overall patient group

|                                                       |   | Serum ferritin initial phase |   | Serum ferritin finalphase |
|-------------------------------------------------------|---|------------------------------|---|---------------------------|
| Physical functions (initial phase,final phase)        | r | -0.212                       | R | -0.352                    |
|                                                       | p | 0.121                        | P | 0.008                     |
| Role-physical (initial phase, finalphase)             | r | -0.060                       | R | -0.133                    |
|                                                       | p | 0.661                        | P | 0.332                     |
| Bodily pain (initial phase, finalphase)               | r | -0.141                       | R | -0.038                    |
|                                                       | p | 0.305                        | P | 0.784                     |
| General health perception(initial phase, final phase) | r | 0.008                        | R | -0.127                    |
|                                                       | p | 0.953                        | P | 0.354                     |
| Vitality (initial phase, finalphase)                  | r | -0.024                       | R | -0.211                    |
|                                                       | p | 0.864                        | P | 0.121                     |
| Social functioning (initial phase,final phase)        | r | -0.173                       | R | -0.200                    |
|                                                       | p | 0.207                        | P | 0.142                     |
| Role-emotional (initial phase,final phase)            | r | 0.157                        | R | -0.094                    |
|                                                       | p | 0.253                        | P | 0.495                     |
| Mental health (initial phase,final phase)             | r | 0.064                        | R | 0.110                     |
|                                                       | p | 0.643                        | P | 0.424                     |
